# Supplementary material for: A Putative Role of Vasopressin/Oxytocin-Type Neuropeptide in Osmoregulation and Feeding Inhibition of Apostichopus japonicus
Source: MDPI journal article supplement (doi:10.3390/ijms241814358), 2023-09-20
Supplement: s1 [file s1]

**Table S1. Accession numbers or citations of VP/OT-type peptide and precursor in deuterostomes.**

| Classification | Abbreviations  | Full Species name                    | Accession numbers or citations |
|----------------|----------------|--------------------------------------|--------------------------------|
| Deuterostomes  | <i>H_sapVP</i> | <i>Homo sapiens (vasopressin)</i>    | M25647                         |
|                | <i>H_sapOT</i> | <i>Homo sapiens (oxytocin)</i>       | M25650                         |
|                | <i>S_pli</i>   | <i>Styela plicata</i>                | AB255884                       |
|                | <i>C_int</i>   | <i>Ciona intestinalis</i>            | AB432887                       |
|                | <i>B_flo</i>   | <i>Branchiostoma floridae</i>        | XM_002608950                   |
|                | <i>S_kow</i>   | <i>Saccoglossus kowalevskii</i>      | FF512954                       |
|                | <i>S_pur</i>   | <i>Strongylocentrotus purpuratus</i> | XM_003724442.2                 |
|                | <i>A_jap</i>   | <i>Apostichopus japonicus</i>        | MF401997                       |
|                | <i>H_gla</i>   | <i>Holothuria glaberrima</i>         | [53]                           |
|                | <i>H_sca</i>   | <i>Holothuria scabra</i>             |                                |
|                | <i>A_rub</i>   | <i>Asterias rubens</i>               | GenBank: KT601711              |
|                | <i>A_pla</i>   | <i>Acanthaster planci</i>            | [36]                           |
|                | <i>O_vic</i>   | <i>Ophionotus victoriae</i>          | [48]                           |
|                | <i>O_ara</i>   | <i>Ophiopsila aranea</i>             |                                |
|                | <i>A_fil</i>   | <i>Amphiura filiformis</i>           |                                |
|                | <i>An_jap</i>  | <i>Anneissia japonica</i>            | [47]                           |
|                | <i>A_med</i>   | <i>Antedon mediterranea</i>          |                                |
|                | <i>F_ser</i>   | <i>Florometra serratissima</i>       |                                |

**Table S2. Primers used for RACE, RT-qPCR analysis and Plasmid construction.**

| Primers                      | Sequence (5'-3')                             | Used    |
|------------------------------|----------------------------------------------|---------|
| <i>Holotocin precursor-R</i> | GATTACGCCAAGCTTTGGCTAGGCTT<br>TCAGTGTGTGGAGT | 5'RACE  |
| <i>AjHOR-R</i>               | GATTACGCCAAGCTTAAATGTAGTCC<br>TCGGTCCAGCGGGG | 5'RACE  |
| <i>AjHOR-F</i>               | GATTACGCCAAGCTTGAATCACGTGG<br>CCACTACGACAGCC | 3'RACE  |
| <i>Holotocin precursor-F</i> | ATGTGTTCTGTGCCGCTCTT                         | RT-qPCR |
| <i>Holotocin precursor-R</i> | GCAATGGTCTCCTACGACTTCA                       |         |
| <i>AjHOR-F</i>               | ATGATGACGAGGAACACAATGG                       |         |
| <i>AjHOR-R</i>               | AGCAGACGATATACACGGTTACT                      |         |
| <i>AjCCKP1-F</i>             | GTTAGTCAACCCGAAGGA                           |         |
| <i>AjCCKP1-R</i>             | TGAATATCGTGCGAGGAG                           |         |
| <i>AjCCKP2-F</i>             | TCAGTAATATGCGTCCTTGCT                        |         |
| <i>AjCCKP2-R</i>             | TCCAGTGCTTCCAGTTCATC                         |         |

|                            |                                   |                                 |
|----------------------------|-----------------------------------|---------------------------------|
| $\beta$ -Actin-F           | AAGGTTATGCTCTTCCTCACGCT           |                                 |
| $\beta$ -Actin-R           | GATGTCACGGACGATTTCACG             |                                 |
| $\beta$ -Tubulin-F         | GAAAGCCTTACGACGGAACA              |                                 |
| $\beta$ -Tubulin-R         | CACCACGTGGACTCAAAATG              |                                 |
| Holotocin precursor-F(ISH) | CCACTGTGAGGTGAATGTGCAAGATGTC      | In situ hybridization           |
| Holotocin precursor-R(ISH) | TGTCTCCAATACCGCCTGGCTCGTA         |                                 |
| AjHOR-F(PC)                | CGCGGATCCAAAATGGCGGTGCACTACGC     | pcDNA3.1(+) plasmid constructed |
| AjHOR-R(PC)                | CCGGAATTCTCAAAAATGCCGAATTAGCGT    |                                 |
| AjHOR-F(EGFP)              | CCGGAATTCTGAAAATGGCGGTGCAC TACGC  | EGFP plasmid constructed        |
| AjHOR-R(EGFP)              | CGCGGATCCCGAAAATGCCGAATTAGC GTTAT |                                 |

**Table S3. Accession numbers of VP/OT-type, NPS/CCAP/NG peptide-type, and TRH-type neuropeptide receptors.**

| Abbreviations      | Full species name                    | Accession numbers     |
|--------------------|--------------------------------------|-----------------------|
| <i>H_sapV1aR</i>   | <i>Homo sapiens</i>                  | NM_000706.4           |
| <i>H_sapV1bR</i>   | <i>Homo sapiens</i>                  | NM_000707.4           |
| <i>H_sapV2R</i>    | <i>Homo sapiens</i>                  | NM_000054.5           |
| <i>H_sapOTR</i>    | <i>Homo sapiens</i>                  | NM_001354655.1        |
| <i>A_japVPOTR</i>  | <i>Apostichopus japonicus</i>        | PIK60987              |
| <i>S_kowVPOTR</i>  | <i>Saccoglossus kowalevskii</i>      | XP_002735546          |
| <i>S_purVPOTR</i>  | <i>Strongylocentrotus purpuratus</i> | XM_779280.4           |
| <i>A_rubVPOTR</i>  | <i>Asterias rubens</i>               | MK279533              |
| <i>L_staVPOTR</i>  | <i>Lymnaea stagnalis</i>             | U27464.1 <sup>a</sup> |
| <i>E_fetVPOTR</i>  | <i>Eisenia fetida</i>                | AB121771.1            |
| <i>T_casVPOTR</i>  | <i>Tribolium castaneum</i>           | EU128495.1            |
| <i>H_sapNPSR</i>   | <i>Homo sapiens</i>                  | AY310326.1            |
| <i>B_floNPSR1</i>  | <i>Branchiostoma floridae</i>        | XP_002605431          |
| <i>B_floNPSR2</i>  | <i>Branchiostoma floridae</i>        | XP_002605430          |
| <i>A_japNPSR</i>   | <i>Apostichopus japonicus</i>        | PIK35938              |
| <i>A_rubNGFFYR</i> | <i>Asterias rubens</i>               | KP171535              |
| <i>S_purNGFFFR</i> | <i>Strongylocentrotus purpuratus</i> | KP171538              |
| <i>L_gigCCAPR</i>  | <i>Lottia gigantea</i>               | XP_009061331          |
| <i>C_telCCAPR</i>  | <i>Capitella teleta</i>              | ELU12393              |
| <i>D_melCCAPR</i>  | <i>Drosophila melanogaster</i>       | AY219842              |
| <i>T_casCCAPR</i>  | <i>Tribolium castaneum</i>           | NM_001083326          |
| <i>H_sapTRHR</i>   | <i>Homo sapiens</i>                  | ENSG00000174417       |
| <i>S_purTRHR</i>   | <i>Strongylocentrotus purpuratus</i> | XP_783972.2           |
| <i>P_dumTRHR</i>   | <i>Platynereis dumerilii</i>         | AKQ63029              |
| <i>P_cauTRHR</i>   | <i>Priapulus caudatus</i>            | XP_014663378          |
| <i>D_pulTRHR</i>   | <i>Daphnia pulex</i>                 | ADZ15312              |
| <i>C_eleTRHR</i>   | <i>Caenorhabditis elegans</i>        | CCD66234              |
| <i>L_varOTR</i>    | <i>Lytechinus variegatus</i>         | XM_041620700.1        |
| <i>P_minV1aR</i>   | <i>Patiria miniata</i>               | XM_038193257.1        |
