# Supplementary material for: A Putative Role of Vasopressin/Oxytocin-Type Neuropeptide in Osmoregulation and Feeding Inhibition of Apostichopus japonicus
Source: MDPI journal article supplement (doi:10.3390/ijms241814358), 2023-09-20
Supplement: s1 [file s1]

[illegible]

294 V G A R A K I K A I K M G L T V T V V Y  
1141 GGGTATGACGGGCTAAGATTAAACATCAAGTGAAGCTCACCATASTAACTGGTATATA  
334 T M 6 (306-334)  
1201 V C W P F F A L C E V E W D L I L  
1201 TGTCTGCTGGAGTCCTCTCTTGTGCAATGGTGTGAAGCTGGGACATACTGGTAT  
334 H N W V R T L F N I V A N L C T N  
1261 TACATTAATTGGGTGTCTAGCTATTCAATATTGGGCCAACCTGAAAGCTGTGACCAACT  
374 T M 7 (354-374)  
1354 I Y I V L V F S G N V I G A T K D L F W Y  
1321 CATGATGATACCTGATTTCAGTCGGCAATGTGCTGGTGCTTACCAAGTATCTCTGCTG  
374 C H V C R H T N E R H V A T A Q G  
1381 ACTGCATGTCTCTGTGCACCAATAGAGGAATCAOSTGGCCTACTGCAGACGCCAAG  
394 D E P S R F F P A G R T F T T  
1441 GGGAGCAACGTCFAGTGCATTGTTCCTACCCCGCTGGACGGAGGACTATTATTCCT  
414 G A E H K V D N N N S A F \*  
1501 CCACGCGACGGCGGACCAATAGGTGGACATACGCTAATTTCGCCGATTTCGTGCTGACTA  
1561 cgaatgcgtgaatcagctaaatgcgaatgaacacaaacaccccaagatctcagctgt  
1621 taatcaataaataaatttccatcagctcagctcagctgtggataatcaaacacccagatgt  
1741 aggttcctgtggagtgatgaataaactatcagcgcgaataaataaatacagaacagatgacg  
1801 cgaatgcgtgcagctgacacacacacacacacacacacacacacacacacacacacacacac  
1861 ccagctgggaagacgcagatcatcagcaataatcagctattcctcagagaggttctctcgtgt  
1901 gaaaaaaatcagctcagctcattcagctacgcacgaataatcagctcgcgctgcgaagc  
1921 gaactgaatcatcattcagctcgttgaaacgcgttcataaatttgaatgttgatcagaataat  
1981 gttggatgcacacacacagagtggaatccacagctgagctgtgtgtgaatgtctgcgtga  
2041 atgaataattcattatatttcagctggttgaaacacaccccttctcgtcagctatgacacatc  
2101 ttaaaagacatcatcgaaggaataatcgtcttgctggaaaaaaaagcaaacctatcgtc  
2161 cgtacatccctccaagcagcaaatatcccttgatcatcagctatgtgacagaatgatg  
2221 aataatgttgttgttgtggaagacgcgtgtcattcagatcagatcacatcagatataatt  
2281 gctatataatgaggtcagtcagaggaacagctcgtgttatcagacatgaagctcaaaagat  
2341 ggaatgtatgcattctcattcattcaactcttggttcacataataactacatgcgaacccata  
2401 cgaatgcgtgcagctcagctcagctcagctcagctcagctcagctcagctcagctcagctcag  
2461 ttttttttgaaatccctgccttcttggttgaaattcttcactaattgacctcagctcagatag  
2521 tcaagctgtggtgtgaagccacagctcctttcttcaaacacgtggaagatgaattggtggt  
2581 aaaggcggccagcttatctctgggggttgcttaattgaattatcaacataatcagctgtgcc  
2641 ctacagccgctgcagacataataagaagaccccccccgaagttctccagacacataat  
2701 gggagagatataatttcccaatcgaatcagcgtggaatgcacacacacacacacacacac  
2761 cgtgatacctcgaagct

B

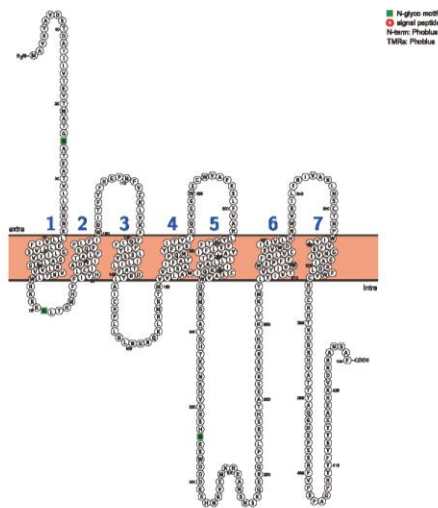

C

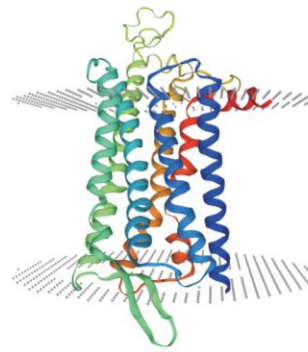

**Figure S2.** Molecular structure and characterization of *AjHOR* in *A. japonicus*. **(A)** *AjHOR* cDNA sequence (GenBank accession number: PIK60987.1) and the deduced amino acid sequence. ORF were denoted in uppercase; 3'UTR and 5'UTR were shown in lowercase. The asterisk (\*) indicated the termination codon. The square indicated phosphorylation sites. The seven transmembrane domains (TM1-TM7) were labeled in blue underline. **(B)** Seven transmembrane domains of *AjHOR*. The number showed the position of seven transmembrane domains. **(C)** Protein tertiary structure of *AjHOR*.



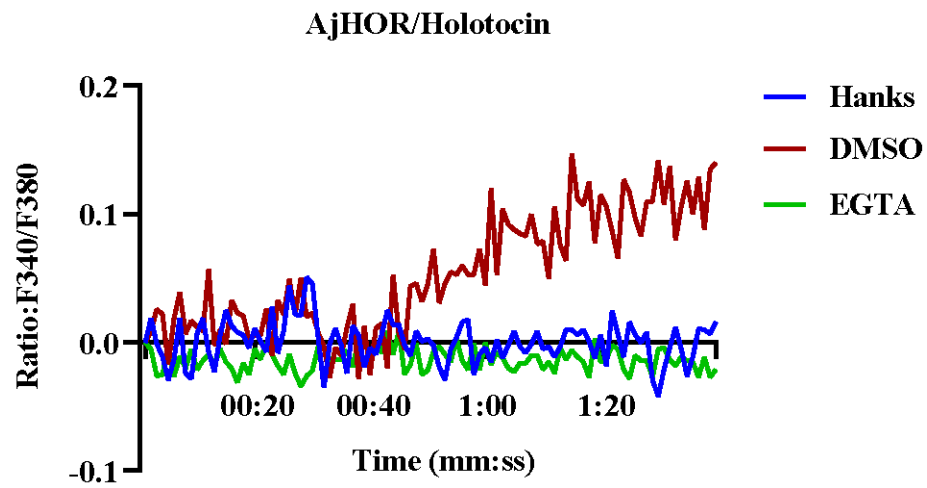

**Figure S5.** Calcium chelators EGTA (5 mM) on holotocin (1  $\mu$ M) in DMSO-mediated  $\text{Ca}^{2+}$  influx in HEK293T cells. All experiments were repeated independently three times with similar results.

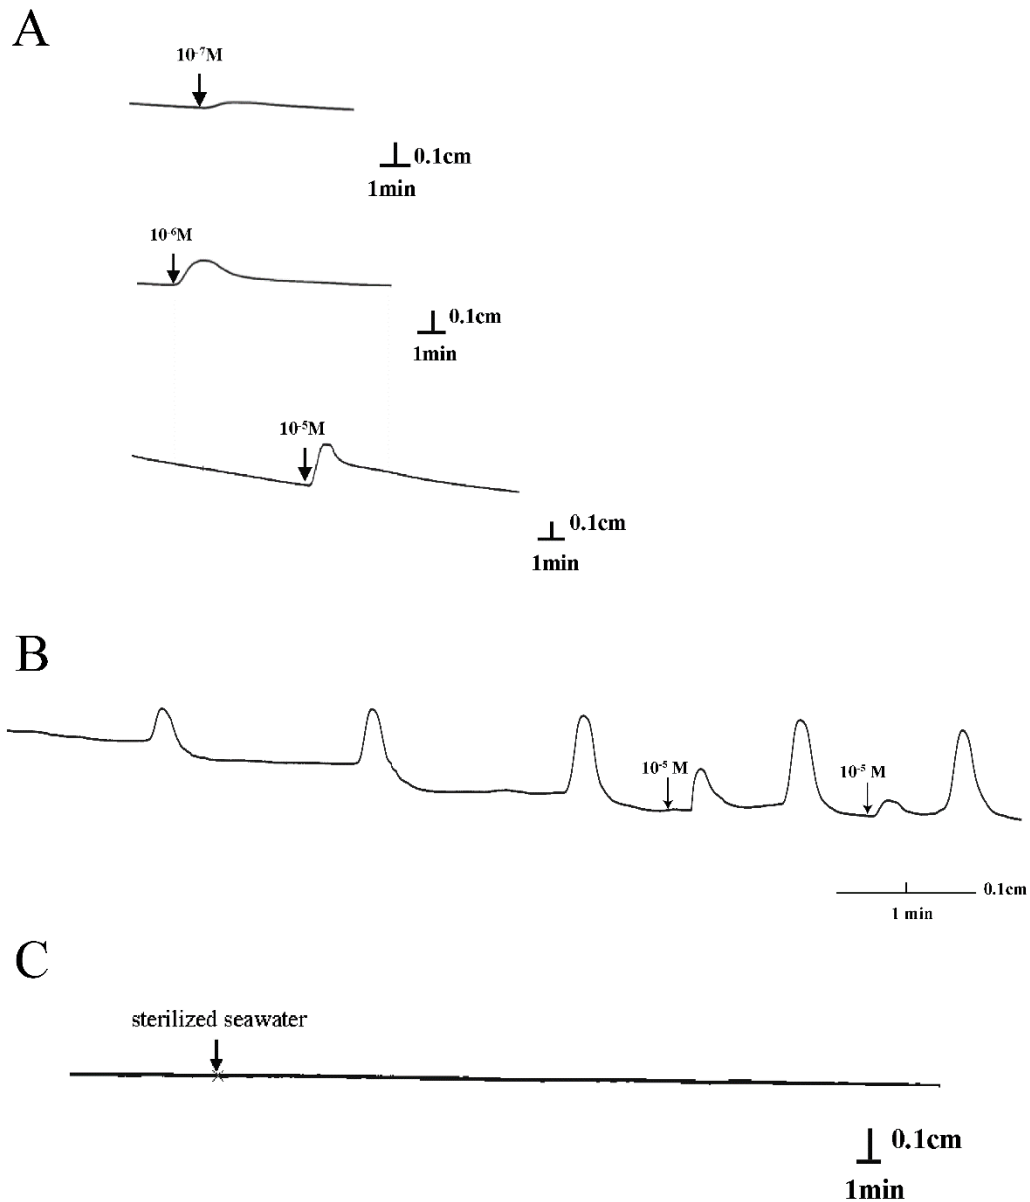

**Figure S6.** Negative and positive controls of *in vitro* pharmacological experiments and the necessity detection of calcium ions during longitudinal muscle contraction caused by holotocin. **(A)** NGIWyamide caused tonic contraction on longitudinal muscle preparations from *A. japonicus*. ( $n = 3$ ). **(B)** A representative recording showed that holotocin ( $10^{-5}M$ ) caused contraction of tentacle preparation. **(C)** Sterile seawater was used as the negative control and it could not cause the contraction of preparations.

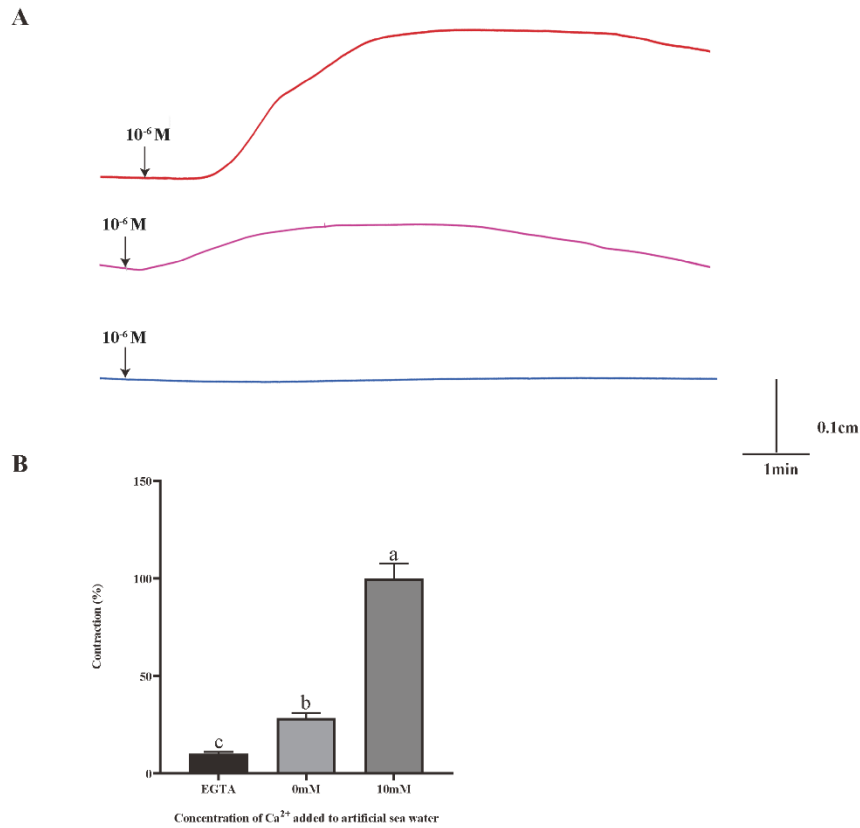

**Figure S7.** Dependence of holotocin contraction on different calcium ion concentration ( $\text{Ca}^{2+}$ -free solution containing 5 mM EGTA, 0 mM, 10 mM). **(A)** A representative recording showed that holotocin ( $10^{-6}$  M) caused longitudinal muscle contraction on artificial sea water with 0 mM or 10 mM  $\text{Ca}^{2+}$ . EGTA was used to chelate calcium ions and holotocin could not cause longitudinal muscle contraction. **(B)** Comparison of contraction efficiency of holotocin with different  $\text{Ca}^{2+}$  concentration, the contraction efficiency of holotocin in 10 mM  $\text{Ca}^{2+}$  was defined as 100%. The significant difference ( $p < 0.05$ ) was shown by lowercase letters. Values were mean  $\pm$  S.E.M (n = 3 biological replicates).

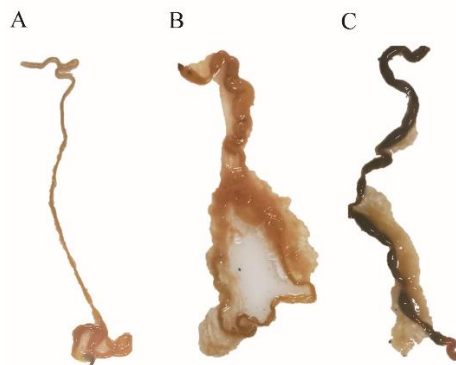

**Figure S8.** The anatomy of intestine during long-term injection in different groups. **(A)** The state of intestine in HOL. **(B)** The state of intestine in HOH. **(C)** The state of intestine after injection in CO.
